# Supplementary material for: How Smes Expand in International Business Through E-Commerce: The Case of Istanbul
Source: Research Square preprint supplement (doi:10.21203/rs.3.rs-7899245/v1), 2025-11-17
Supplement: Supplementary file 1 [file 93205a130968a8c430681077.docx]

TABLES OF THE STUDY

Table 1. Theories’ Summary of **Complementary Perspective**

| Theory | Key Contribution to the Study |
| --- | --- |
| Internationalization Theory (Johanson & Vahlne, 1977) | Explains how firms expand across borders through learning and risk management. |
| E-Commerce Adoption Models (DePietro et al., 1990; Nalla & Reddy, 2024) | Clarify the conditions under which SMEs adopt digital platforms. |
| Resource-Based View (Barney, 1991; Taher, 2021) | Highlights the internal strengths SMEs must leverage to succeed globally. |
| Diffusion of Innovations (Rogers et al., 2014; Purnomo, 2023) | Sheds light on the process and pace of technology adoption among SMEs. |
| Transaction Cost Economics (Williamson, 1979; Tolstoy et al., 2021) | Examine the economic rationale behind operational choices in digital commerce. |

**Table 2.** Participant Profile

| Percentage | Number of participants | Category | Characteristics |
| --- | --- | --- | --- |
| 33% | 5 | Retail | **Industry** |
| 33% | 5 | Technology |
| 34% | 5 | Consumer goods |
| 52% | 13 | Male | **Gender** |
| 48% | 12 | Female |
| 36% | 9 | 30-40 years | **Age** |
| 44% | 11 | 41-50 years |
| 20% | 5 | Above 50 years |
| 24% | 6 | 5-10 years | **Tenure** |
| 52% | 13 | 11-20 years |
| 24% | 6 | More than 20 years |
| 16% | 4 | General Manager | **Position** |
| 20% | 5 | Operations Manager |
| 20% | 5 | HR Manager |
| 44% | 11 | Guest Services/Front Office |

**Table 3.** Interview Findings

| **Codes** | **Axial Codes** | **Themes** | **Subthemes** | **Quotations** | **Participant** |
| --- | --- | --- | --- | --- | --- |
| Platforms | Platform usage | **Digital Platform Strategies** | Social media marketing, marketplace selection | “Instagram gives us direct access to international buyers without paying platform fees.” | **P1** |
| Logistics | Operational challenges | **Logistics and Payment Barriers** | Last-mile delivery, cross-border payments | “We lose customers because shipments get stuck or delayed at customs.” | **P3** |
| Regulations | Institutional complexity | **Regulatory and Institutional Barriers** | Compliance issues, legal uncertainty | “We tried exporting to Germany but didn’t know the labeling rules—they returned the whole batch.” | **P4** |
| Trust to visuals | Customer trust through visuals | **Localization and Customer Experience** | Language, cultural adaptation, visuals | “We changed our product photos and added Arabic descriptions—sales in the Gulf doubled” | **P6** |
| Learning by peers | Informal learning | **Experiential and Adaptive Strategies** | Peer learning, trial-and-error | “We watch what other sellers do and copy what works—it’s trial and error” | **P9** |
